# Supplementary material for: Long-term safety and efficacy of cipaglucosidase alfa plus miglustat in individuals living with Pompe disease: an open-label phase I/II study (ATB200-02)
Source: Springer Nature journal article supplement (doi:10.1007/s00415-023-12096-0), 2023-12-06
Supplement: MOESM2 [file 26498894]

# Long-term safety and efficacy of cipaglucoisidase alfa plus miglustat in individuals living with Pompe disease: an open-label Phase I/II study (ATB200-02)

Barry J. Byrne et al

## What is Pompe disease?

Pompe disease is a rare, inherited, multisystemic disorder that leads to **muscle weakness** and **breathing difficulties** over time. It is caused by the **lack of an enzyme called acid  $\alpha$ -glucosidase (GAA)**, typically found inside muscle cells.

In healthy muscle cells, the **GAA enzyme breaks down the sugar glycogen into glucose**.

But, in Pompe disease, the deficiency in GAA enzyme activity means that **glycogen cannot be broken down and it builds up inside muscle cells**, which causes damage leading to muscle weakness and breathing difficulties over time.

## Why did we do this study?

### Treatment considerations

Current therapies aim to replace the missing GAA enzyme in the muscle cells of people living with Pompe disease. These are called enzyme replacement therapies (ERTs) and are associated with the following key challenges:

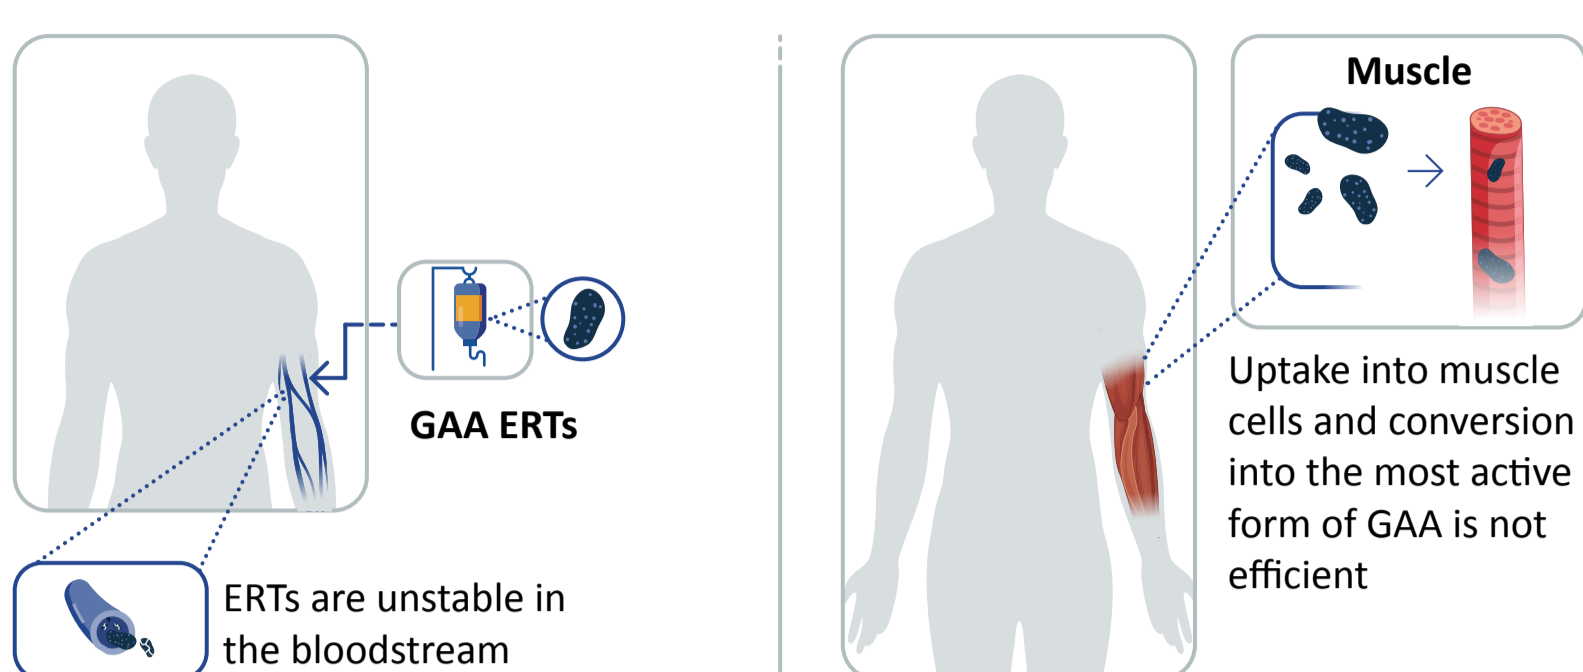

### Novel therapy: cipaglucoisidase alfa + miglustat

Cipaglucoisidase alfa + miglustat is a novel two-component therapy designed to minimize breakdown in the bloodstream before it reaches the target muscle cells and to improve uptake into muscle cells

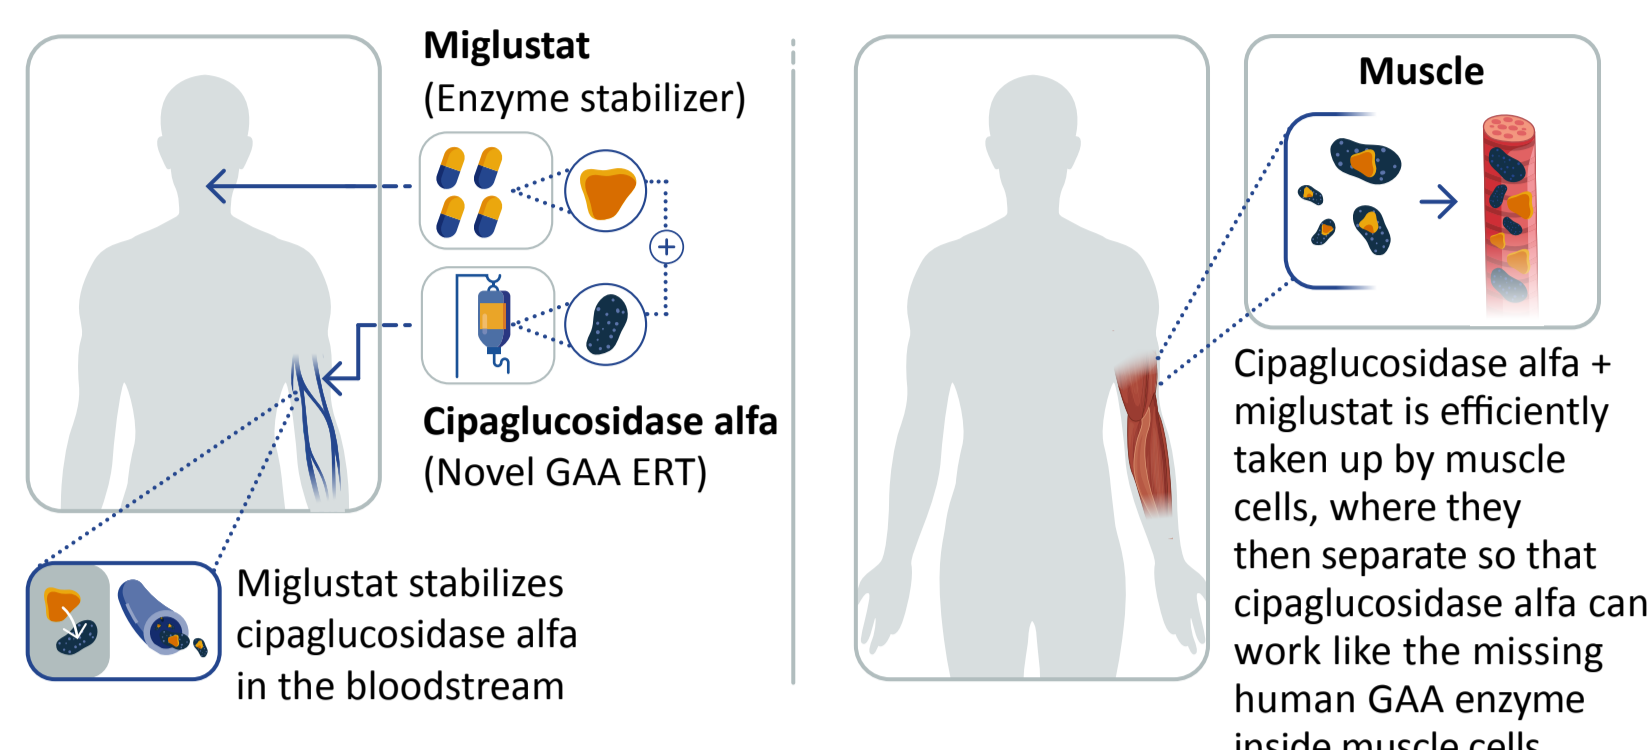

We are doing this study to investigate whether cipaglucoisidase alfa + miglustat improves the measurements of disease progression in people living with Pompe disease

## How did we do this study?

### We enrolled three groups of ambulatory participants

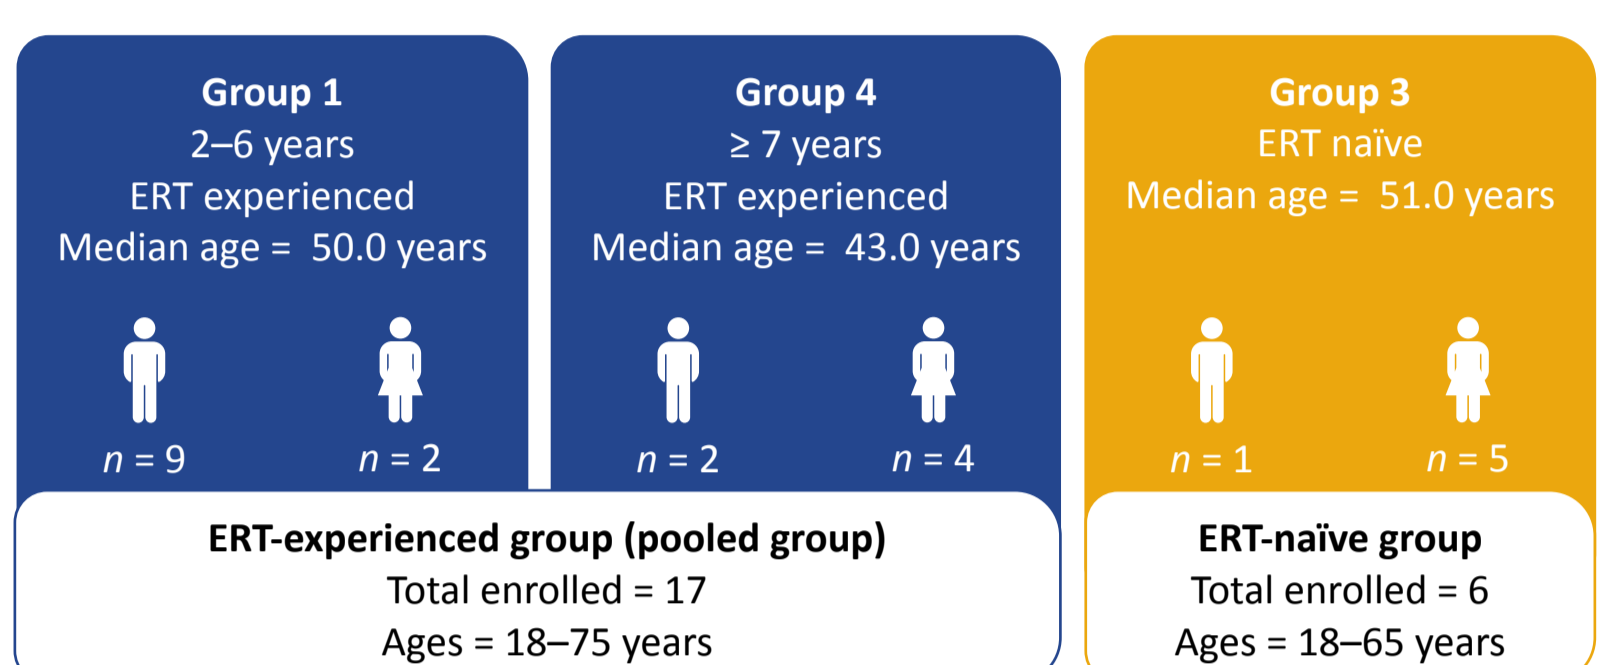

Participants were enrolled at different times; therefore, not everyone has reached the later time points of this ongoing study

### All participants received cipaglucoisidase alfa + miglustat every 2 weeks

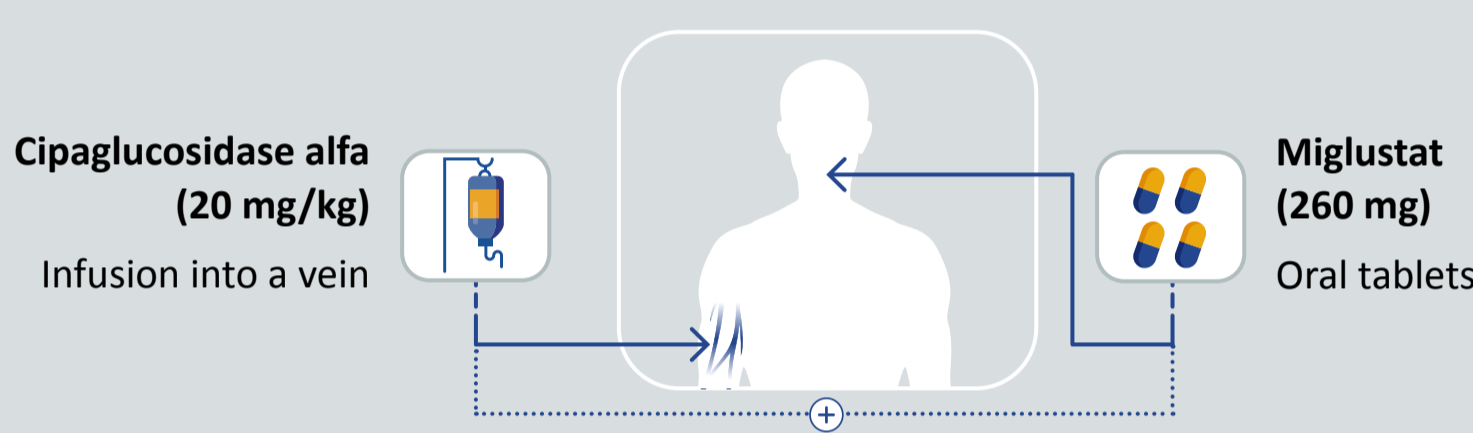

### We checked standard Pompe disease assessments in participants at regular time intervals

- We measured the **motor function**, **lung function**, **urine marker levels for glycogen build-up (hexose tetrasaccharide [Hex4])**, **blood marker levels for muscle damage (creatin kinase [CK])**, and **medical issues** of enrolled participants at different time points over the course of the trial
- The first measurements were taken before treatment began (baseline) and other measurements were taken at different time points up to 48 months after treatment with cipaglucoisidase alfa + miglustat
- This allowed us to investigate how cipaglucoisidase alfa + miglustat treatment impacts the assessment outcomes over time

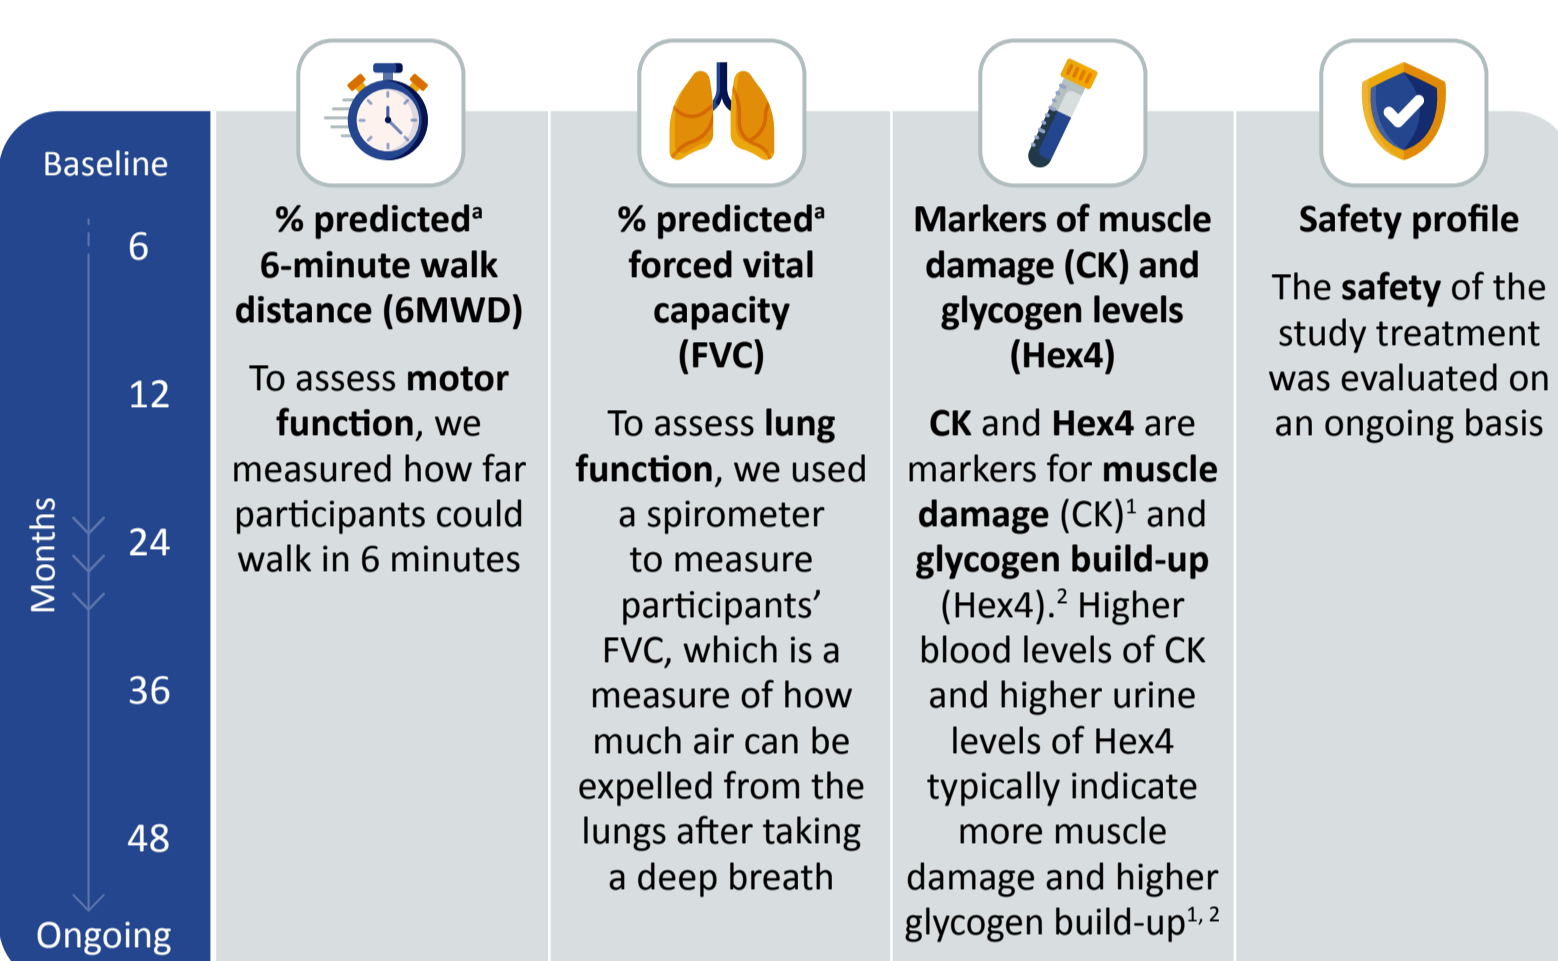

\*6MWD and FVC are calculated as percent (%) predicted, which standardizes the results based on gender, age, height and weight for 6MWD, and gender, age, height and race for FVC

## What have we found so far?

### 6MWD: a measure of motor function

Participants treated with cipaglucoisidase alfa + miglustat **walked further in 6 minutes** compared with before starting treatment, and this improvement was **maintained for up to 48 months**

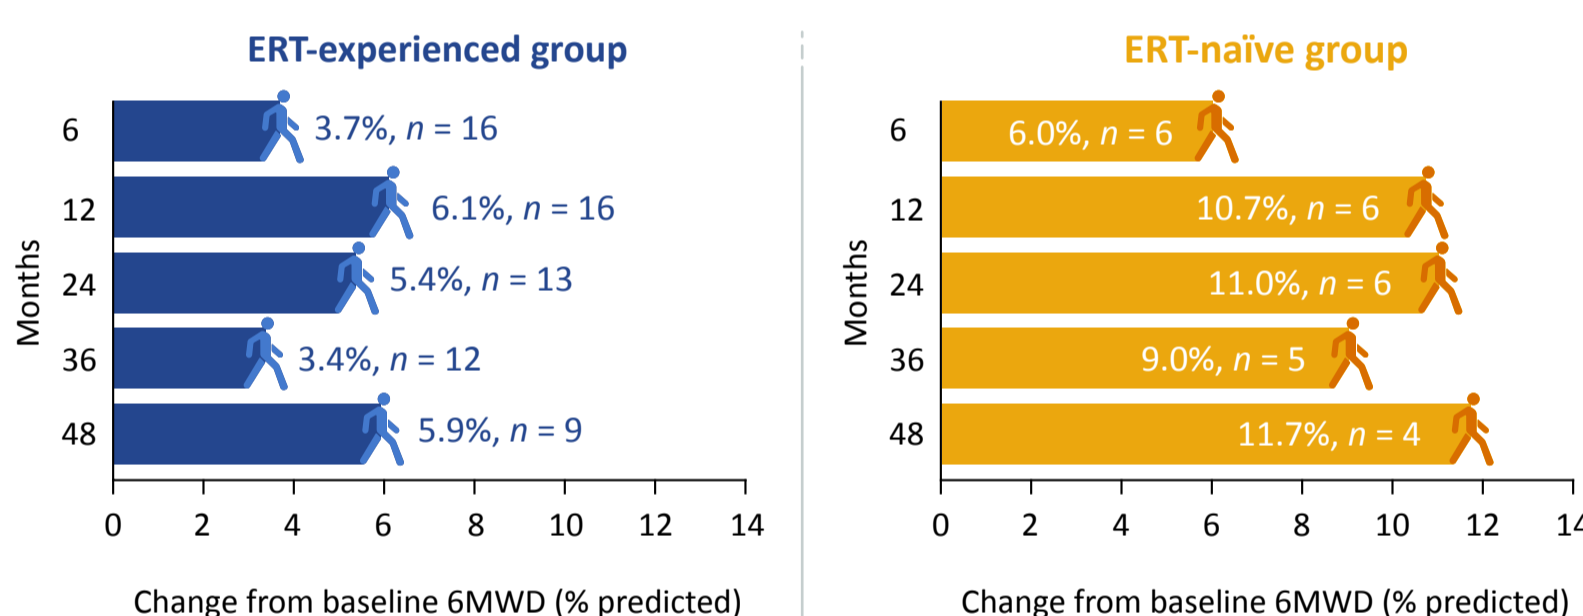

### FVC: a measure of lung function

The **lung function** of participants treated with cipaglucoisidase alfa + miglustat **stabilized or improved** compared with the baseline, and this was **maintained for up to 48 months**

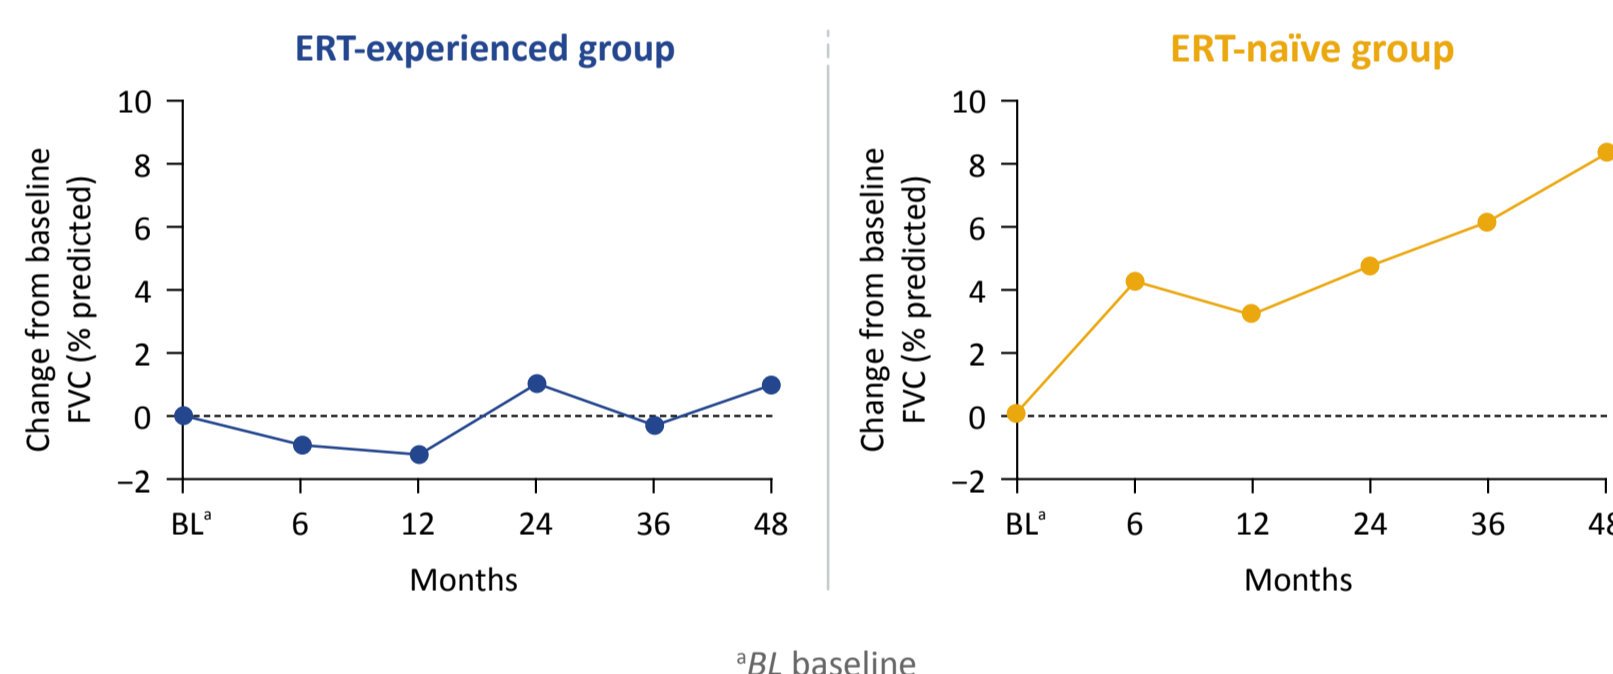

\*BL baseline

### Blood levels of CK: a marker for muscle damage

Participants treated with cipaglucoisidase alfa + miglustat had **lower levels of CK**, a blood marker for muscle damage, which may indicate **less damage to muscles**

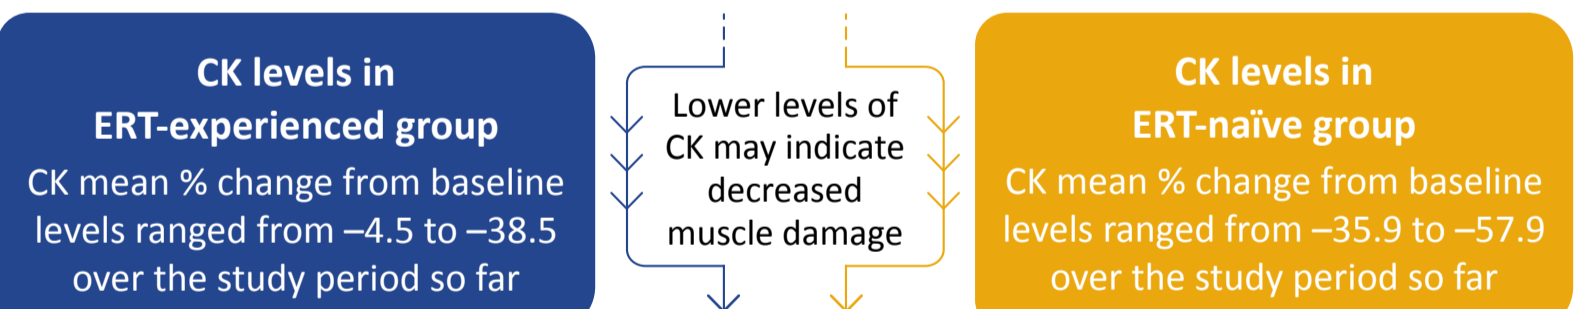

### Urine levels of Hex4: a marker for glycogen build-up

Participants treated with cipaglucoisidase alfa + miglustat had **lower levels of Hex4**, a urine marker for glycogen levels, indicating that the treatment is **breaking down glycogen in the muscle cells**

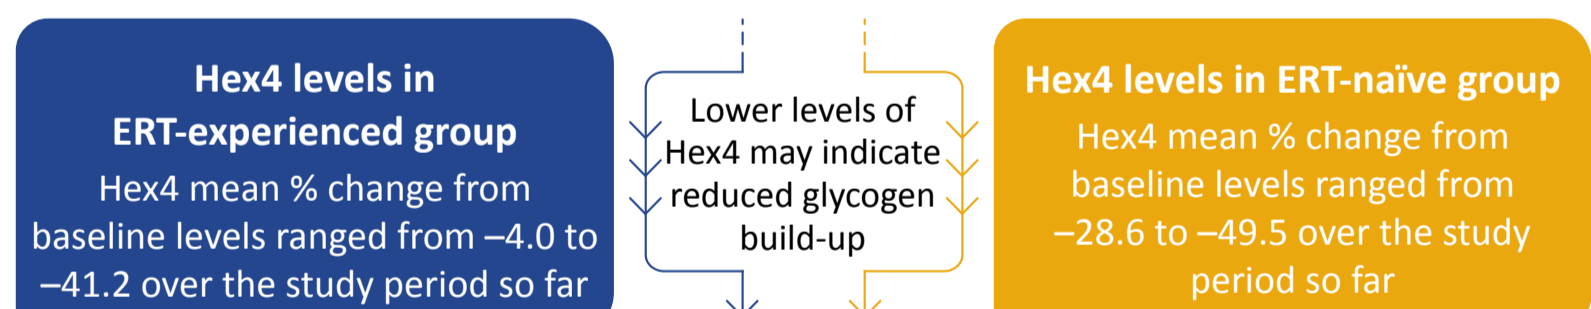

## Safety profile

Most medical issues experienced by participants treated with cipaglucoisidase alfa + miglustat were **mild or moderate** in severity and did not lead to study withdrawal

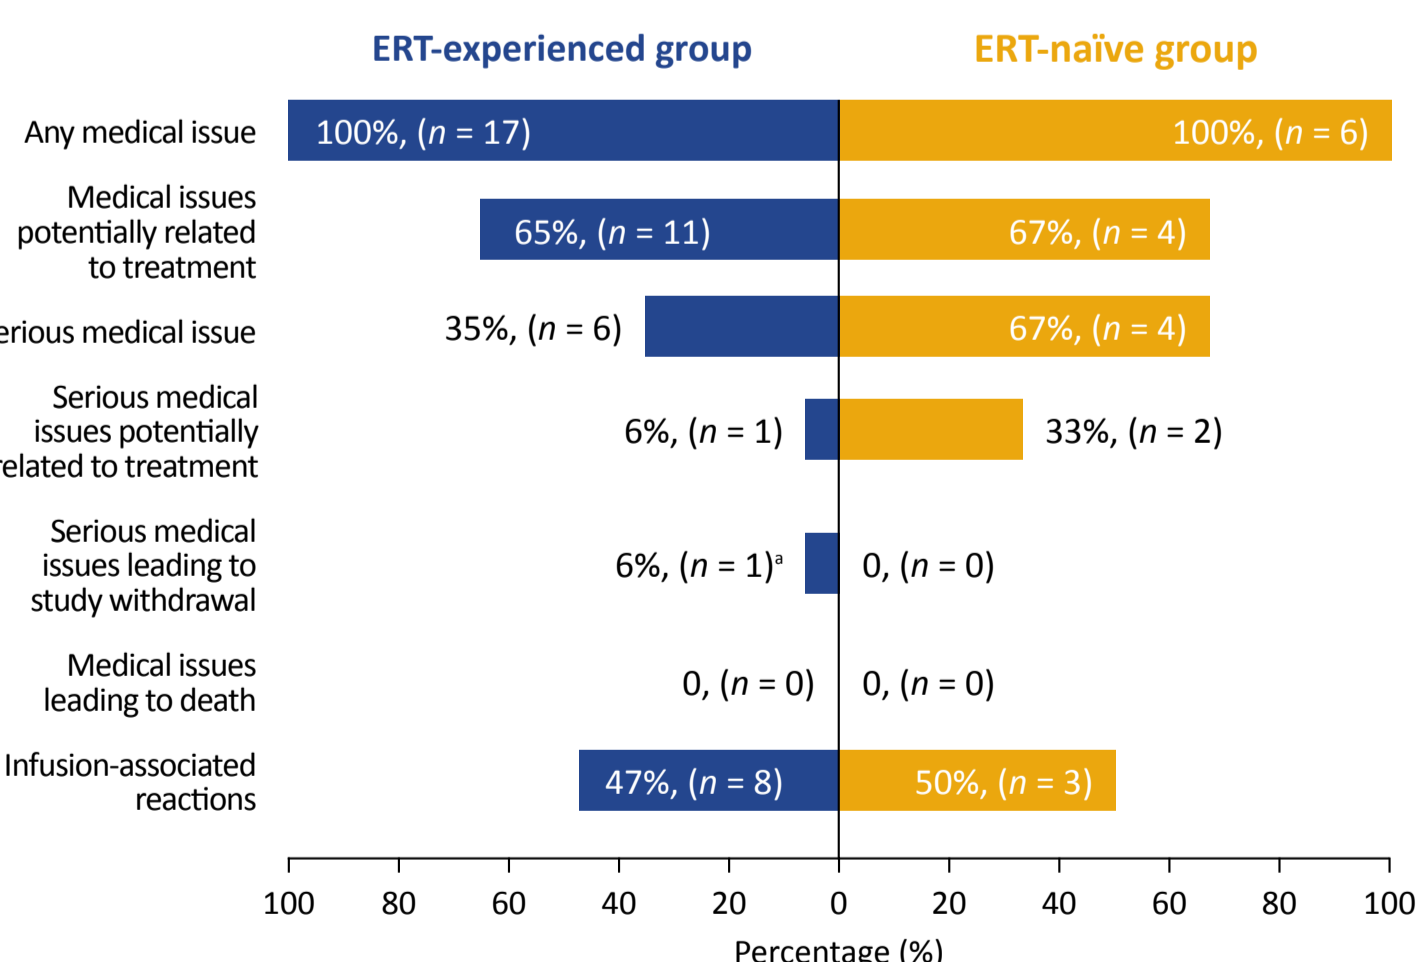

\*One case of diffuse large B-cell lymphoma not related to treatment

The most common **medical issues** that occurred after participants started the study treatment were:

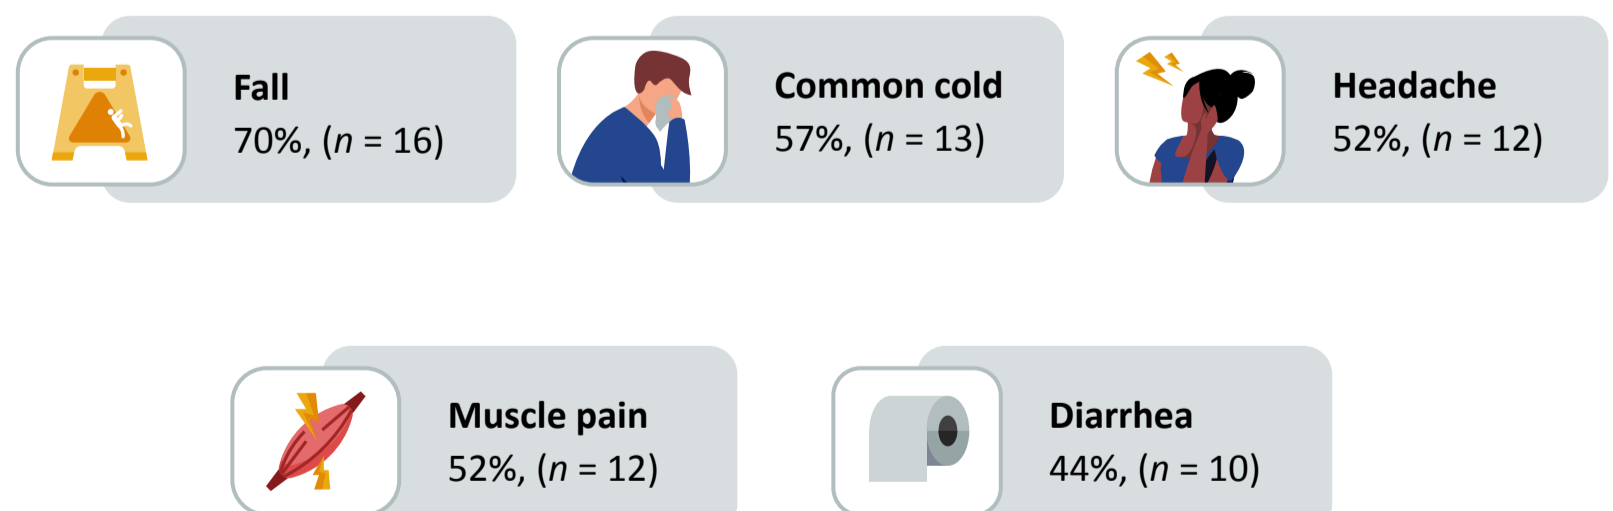

## What do our results mean for people with Pompe disease?

Participants treated with cipaglucoisidase alfa + miglustat had **overall improved outcomes** compared with before treatment

- Participants **could walk further in 6 minutes** compared with before treatment. This indicates that the **motor function** of participants **improved** over the course of the trial so far
- The **lung function** of participants **improved or stabilized** compared with before treatment. This indicates that, on average, participants' **breathing improved or did not get worse** during the trial so far
- A blood marker for muscle damage (**CK**) and a urine marker for glycogen build-up (**Hex4**) both decreased in participants compared with before treatment started, which could indicate an **improvement in disease progression**
- Most **side effects** were **mild or moderate in severity** and did not lead to withdrawal from the study. This indicates that cipaglucoisidase alfa + miglustat is **well tolerated overall** by participants enrolled in the trial and has a safety profile consistent with currently available ERTs
